# Supplementary material for: GPT2 mediates metabolic alterations in platinum-resistant ovarian cancer cells
Source: Research Square preprint supplement (doi:10.21203/rs.3.rs-6480518/v1), 2025-05-09
Supplement: Supplementary file 1 [file 16c9aa9143fc2c012474d680.docx]

**Supplementary Figures**

**Supplementary Figure 1. Cisplatin-resistant ovarian cancer cells have high glutamine levels compared to their parental cells.** Untargeted metabolomics analysis of cisplatin-resistant (CP5) OVCAR8 and OVCAR3 cells compared to their parental (CP0) cells. Error bars represent standard deviation. Arg = arginine, His = histidine, Lys = lysine, Asp = aspartic acid, Glu = glutamic acid, Ser = serine, Thr = threonine, Asn = asparagine, Gln = glutamine, Ala = alanine, Vall = valine, Ile = isoleucine, Met = methionine, Phe = phenylalanine, Tyr = Tyrosine.

**Supplementary Figure 2. Differential expression of enzymes involved in glutaminolysis.** (A) qPCR and western blot were performed on OVCAR3-CP0 and OVCAR3-CP5 to determine the mRNA and protein levels of GPT2. (B-C) qPCR was performed on (B) OVCAR3-CP0, OVCAR3-CP5, and (C) OVCAR8-CP0, and OVCAR8-CP5 to determine the mRNA levels of enzymes involved in glutaminolysis pathways such as glutamate-oxaloacetate transaminase 2 (*GOT2*) and glutaminase (*GLS*). N = 4 or 5 individual experiments as indicated by each dot, t-test, ns = not significant, * p < 0.05, **** p < 0.0001

**Supplementary Figure 3. Differential expression of enzymes involved in TCA cycle.** (A-B) qPCR was performed on (A) OVCAR8 lines (OVCAR8-CP0 andOVCAR8-CP5) and (B) OVCAR3 lines (OVCAR3-CP0 and OVCAR3-CP5) to determine the mRNA levels of enzymes involved in tricarboxylic acid (TCA) cycle such as pyruvate dehydrogenase α1 (*PDHA1*), citrate synthase (*CS*), aconitase 2 (*ACO2*), isocitrate dehydrogenase 2 (*IDH2*), oxoglutarate (α-ketoglutarate) dehydrogenase (*OGDH*), dihydrolipoamide S-succinyltransferase (*DLST*), succinate-CoA ligase GDP-forming subunit β (*SUCLG2*), succinate dehydrogenase complex subunit C (*SDH2*), fumarate hydratase (*FH*), and malate dehydrogenase 2 (*MDH2*). N = 3 individual experiments as indicated by each dot, t-test, ns = not significant, * p < 0.05, ** p < 0.01, *** p < 0.001, and **** p < 0.0001.

**Images of the whole blot**
